# Supplementary material
Source: publisher figshare collection journal article supplement (https://acs.figshare.com/ndownloader/files/17869157)
Supplement: Supplementary file 1 [file 17869157]

## Sheet: MetA
SI Figure 11-1 Three best model fits for Methylantranilate (MetA)
Panel A MetA – Fit 1 – Paracellular + uptake + efflux
Panel B MetA – Fit 2 – Paracellular + uptake + efflux +biotransformation
Panel C MetA – Fit 3 – Paracellular + uptake + biotransformation

## Sheet: Lil
SI Figure 11-2 Three best model fits for Lilyflore (Lil)
Panel A Lil – Fit 1 – Paracellular + uptake + efflux
Panel B Lil – Fit 2 – Paracellular + lateral + cytosolic + binding
Panel C Lil – Fit 3 – Paracellular + lateral + cytosolic + biotransformation

## Sheet: DaB
SI Figure 11-3 Three best model fits for Damascone Beta (DaB, - sink)			SI Figure 11-4 Three best model fits for Damascone Beta (DaB, + sink)
Panel A DaB(-sink) – Fit 1 – Paracellular + lateral + cytosolic + biotransformation			Panel A DaB – Fit 1 – Paracellular + uptake + efflux + binding
Panel B DaB(-sink) – Fit 2 – Paracellular + lateral			Panel B DaB – Fit 2 – Paracellular + uptake + efflux
Panel C DaB(-sink) – Fit 3 – Paracellular + uptake + efflux + binding			Panel C DaB – Fit 3 – Paracellular + uptake + efflux + biotransformation

## Sheet: Hel
SI Figure 11-5 Three best model fits for Helvetol (Hel, indirect dosing)			SI Figure 11-6 Three best model fits for Helvetol (Hel, passive dosing)
Panel A Hel – Fit 1 – Paracellular + uptake + efflux + biotransformation			Panel A Hel+PD – Fit 1 – Paracellular + uptake + efflux
Panel B Hel – Fit 2 – Paracellular + uptake + efflux			Panel B Hel+PD – Fit 2 – Paracellular + uptake + efflux + biotransformation
Panel C Hel – Fit 3 – Paracellular + uptake + efflux + binding			Panel C Hel+PD – Fit 3 – Paracellular + lateral

## Sheet: Pa
SI Figure 11-7 Three best model fits for Pamplewood (Pa)
Panel A Pa – Fit 1 – Paracellular + lateral + cytosolic + binding
Panel B Pa – Fit 2 – Paracellular + lateral + cytosolic + biotransformation
Panel C Pa – Fit 3 – Paracellular + uptake + efflux + binding

## Sheet: Nir
SI Figure 11-8 Three best model fits for Nirvanol (Nir, indirect dosing)			SI Figure 11-9 Three best model fits for Nirvanol (Nir, passive dosing)
Panel A Nir – Fit 1 – Paracellular + uptake + efflux + biotransformation			Panel A Nir+PD – Fit 1 – Paracellular + uptake + efflux
Panel B Nir – Fit 2 – Paracellular + uptake + efflux			Panel B Nir+PD – Fit 2 – Paracellular + lateral + cyto + binding
Panel C Nir – Fit 3 – Paracellular + uptake + efflux + binding			Panel C Nir+PD – Fit 3 – Paracellular + uptake + efflux + biotransformation

## Sheet: Cet
SI Figure 11-10 Three best model fits for Cetalox (Cet, - sink)			SI Figure 11-11 Three best model fits for Cetalox (Cet, + sink)
Panel A Cet (-sink) – Fit 1 – Paracellular + uptake + efflux			Panel A Cet – Fit 1 - Paracellular + uptake + efflux
Panel B Cet (-sink) – Fit 2 – Paracellular + uptake + efflux + binding			Panel B Cet – Fit 2 - Paracellular + lateral
Panel C Cet (-sink) – Fit 3 – Paracellular + uptake + efflux + biotransformation			Panel C Cet – Fit 3 - Paracellular + uptake + efflux + binding

## Sheet: Alp
SI Figure 11-12 Three best model fits for Alpinolide (Alp)
Panel A Alp – Fit 1 - Paracellular + uptake
Panel B Alp – Fit 2 - Paracellular + uptake + binding
Panel C Alp – Fit 3 - Paracellular + lateral

## Sheet: MuD
SI Figure 11-13 Three best model fits for Muscenone Delta (MuD, - sink)			SI Figure 11-14 Three best model fits for Muscenone Delta (MuD, + sink)
Panel A MuD (-sink) – Fit 1 - Paracellular + lateral			Panel A MuD – Fit 1 - Paracellular + uptake + efflux + biotransformation
Panel B MuD (-sink) – Fit 2 - Paracellular + lateral + cytosolic			Panel B MuD – Fit 2 - Paracellular + uptake + biotransformation
Panel C MuD (-sink) – Fit 3 - Paracellular + lateral + cytosolic + biotransformation			Panel C MuD – Fit 3 - Paracellular + lateral + cytosolic + binding

## Sheet: To
SI Figure 11-15 Three best model fits forTonalide (To, - sink)			SI Figure 11-16 Three best model fits for Tonalide (To, + sink)
Panel A To (-sink) – Fit 1 - Paracellular + uptake + efflux + binding			Panel A To – Fit 1 - Paracellular + lateral
Panel B To (-sink) – Fit 2 - Paracellular + lateral			Panel B To – Fit 2 - Paracellular + uptake
Panel C To (-sink) – Fit 3 - Paracellular + lateral + cytosolic + biotransformation			Panel C To – Fit 3 - Paracellular + uptake + binding

[truncated: 1 more sheets: Vul]
